# Supplementary material for: Parent Attitudes about Childhood Vaccines: Point Prevalence Survey of Vaccine Hesitancy in an Irish Population
Source: MDPI journal article supplement (doi:10.3390/pharmacy9040188), 2021-11-23
Supplement: s1 [file s1]

**Supplementary information:**

Supplementary Table S1: Routine paediatric vaccination schedule in Ireland (Nov 2018).

| Vaccine                                                                                             | Schedule                                      |
|-----------------------------------------------------------------------------------------------------|-----------------------------------------------|
| Primary immunisation schedule:                                                                      |                                               |
| 6 in 1, PCV, MenB, Rotavirus                                                                        | 2 months                                      |
| 6 in 1, MenB, Rotavirus                                                                             | 4 months                                      |
| 6 in 1, PCV, MenC                                                                                   | 6 months                                      |
| Measles Mumps Rubella (MMR), MenB                                                                   | 12 months                                     |
| Hib/MenC, PCV                                                                                       | 13 months                                     |
| School Programme:                                                                                   |                                               |
| 4 in 1, MMR                                                                                         | Junior infants primary school (age 5-6 years) |
| Human Papillomavirus (for girls in 2018), Tdap (tetanus, diphtheria, pertussis), Meningococcal ACWY | First year secondary school (age 12-13)       |

6 in 1: Diphtheria, Tetanus, (Pertussis), Hib (Haemophilus influenzae type b), Polio (inactivated), Hepatitis B.

PCV: Pneumococcal conjugate vaccine

MenB: Meningococcal B vaccine

MenC: Meningococcal C vaccine

Hib/MenC: Haemophilus influenzae type b, Meningococcal type b combined.

4 in 1: Diphtheria, polio, tetanus, pertussis.

Reference: <https://www.hse.ie/eng/health/immunisation/pubinfo/pcischedule/immschedule/>
